# Supplementary material for: Improving genetic risk prediction across diverse population by disentangling ancestry representations
Source: PubMed Central journal article supplement (PMC10517023; doi:10.1038/s42003-023-05352-6), 2023-09-22
Supplement: 42003_2023_5352_MOESM3_ESM.pdf [file 42003_2023_5352_MOESM3_ESM.pdf]

## **Description of Additional Supplementary Files**

**File name:** Supplementary Data 1

**Description:** Source data behind the graphs in Figure 3.

**File name:** Supplementary Data 2

**Description:** Source data behind the graphs in Figure 4.

**File name:** Supplementary Data 3

**Description:** Source data behind the graphs in Figure 5.

**File name:** Supplementary Data 4

**Description:** Source data behind the graphs in Supplementary Figures 1 and 2.
